# Supplementary material
Source: publisher site journal article supplement (https://www.spandidos-publications.com/5754/downloadSupplementary)
Supplement: Supplementary file 1 [file downloadSupplementary]

## Sheet: Sheet1
Table SI. Inflammation response related genes of Ensembl database.
IRGs
AIF1L
MIR7578
AIF1
C2CD4A
NLRP6
NLRP4E
IL17D
IL25
C2CD4B
GM5849
MIR147
MIR883B
NLRP3
MEFV
ALOX5
SPINK7
CHIL4
FEM1A
IL1F10
IL17B
IL36B
S100A8
S100A9
MIR324
IL17C
FFAR2
MSMP
MACIR
NLRP10
GPSM3
VNN1
NINJ1
IL17RA
CCR2
IL2RA
IL1A
PNMA1
MIR155
MIR301
TRIL
LGALS2
IL36G
IL22
THEMIS2
IL22RA2
TTC39AOS1
VNN3
TNFSF4
MDK
CHIL6
CXCL15
NLRP9B
FPR-RS3
FABP4
CNR2
CHIA1
NPY5R
LACC1
FPR-RS4
HAMP
PLD4
CYSLTR1
IDO1
NLRP4B
NLRP4C
NFKBIZ
MFHAS1
IL1RL2
FPR-RS6
FPR-RS7
NLRP12
FPR3
SERPINE1
NLRP4A
NLRP9C
CHIL3
CCL24
GBP5
PLA2G2D
IL17F
AOC3
FFAR3
ELANE
IL13
CCL11
LTA
IL17A
IL36A
ZBP1
SMPDL3B
PPBP
CXCL1
IL17RC
SIGLECE
MYD88
GM49339
TREX1
TLR6
CASP4
PTGER4
CCL3
IL10
TNIP1
PLA2G10
ASH1L
ZFP580
CXCL17
TRIM55
TLR12
ZFP35
S100A7A
MIR21A
CHIL5
GPR4
IL27
DEFB1
CAMK2N1
KRT1
LTB4R1
CD24A
LXN
AHCYL
LRRC19
H2BC1
TLR11
GPR17
TNFAIP6
KRT16
CHST2
GRN
GPR33
CCL26
GPR31B
PTGDR
FEM1AL
REG3A
IL5
ACKR1
METRNL
LTB4R2
IL4
DDT
SHPK
MUC19
KLKB1
HNRNPA0
ODAM
TUSC2
IFI35
TNFAIP8L2
CD5L
NLRP14
TAC4
LY86
CD96
DNASE1L3
ADAM8
IFI202B
CHST1
DUOXA2
SUCNR1
TNFRSF4
PYCARD
FFAR4
ALOX5AP
FPR2
NLRP1A
SELENOS
SEMA7A
ITGB2L
LBP
TRAF3IP2
CCL1
NR1D2
EPHX2
TNF
CD6
PDCD4
IL1R1
IL36RN
VCAM1
TLR4
TLR9
CX3CL1
CCL2
LILRB4A
TNFAIP3
TNFRSF1A
HMGB2
TAC1
TICAM1
F2R
NLRC3
CX3CR1
SLC7A2
PLA2G3
INS1
NLRP1B
CCR5
FUT7
AIM2
PLD3
BAP1
BCL6
ADCYAP1
CASP1
XCL1
IL1RN
STK39
TLR2
TNFRSF1B
PARP4
AGTR1B
NOD2
TICAM2
OSM
C1QTNF3
CCR1L1
TNFSF18
S1PR3
PTGIR
CCRL2
IL20RB
CTLA2A
SERPINB1A
NAPEPLD
FPR1
SERPINB9
OTULIN
SPATA2
CCR4
CXCR6
IL23R
FUT4
CXCR3
PTGES
TARM1
PLP1
MYLK3
HP
IL34
CCL22
CCL17
NT5E
CSPG4
TLR13
TBXA2R
NLRP2
CCL12
CCL7
CCR3
LRFN5
CD276
LGALS1
LILRA5
KLRH1
NAIP5
REG3B
NAIP6
NAIP2
TLR5
HYAL3
NFKBID
HRH4
CCN3
PTGER2
CAMP
AKNA
DAGLB
BCL6B
MKRN2
LOXL3
ELF3
IER3
ZP3
IL5RA
BDKRB1
CMKLR1
TREM1
DHRS7B
CD163
CCL8
RARRES2
IL17RB
CD68
CCL6
CCL4
DPEP1
PTGER1
BDKRB2
ARG2
AOAH
CD180
CRHBP
PBK
CMA1
APOD
KNG1
CXCL13
WFDC1
C1QTNF12
TREM2
PJA2
MEP1B
TSLP
SCGB1A1
LIPA
GAL
PIK3AP1
CCR1
IL18RAP
SELE
CERS6
ATRN
STARD7
AHCY
TSPAN2
PTGFR
F3
PLAA
PLA2G2E
CTNNBIP1
BST1
LIAS
CXCL5
CXCL3
CXCL9
EIF2AK1
NPY
REG3G
USP18
PGLYRP1
SIGLECG
NDUFC2
IFNG
CD47
NR1H4
GPER1
TLR3
ETS1
IL18
THBS1
INS2
PPARG
RPS19
ADORA1
ZC3H12A
TRPV4
NCF1
PIK3CG
NOS2
RIPK1
PPARA
SETD4
ANXA1
IL1B
CHRNA7
ABCD2
PTAFR
CXCL2
KL
CALCRL
CHIL1
FOXF1
IL17RE
ACKR2
TLR1
ADAMTS12
C5AR1
CRH
SOCS3
PDE5A
SETD6
TRADD
KARS
ABHD12
NLRX1
HPSE
AI182371
AGTR2
GM13304
C5AR2
GPX4
SOCS5
LETMD1
ICAM1
CDK19
FNDC4
CTSS
UCN
BMP6
CAMK1D
NLRC4
DUSP10
TLR8
C3AR1
CLCF1
ITGB2
CLEC10A
LGALS9
TIMP1
ACP5
IL16
HCK
KPNA6
CCN4
WDR83
DNASE1
CCL21D
CCL21B
GM10591
RPS6KA4
ANKRD42
MVK
PBXIP1
GPRC5B
HYAL1
MCOLN2
SLAMF1
NLRP5
PLGRKT
IGFBP4
PTGIS
ADORA2B
CCL9
SDC1
NAIP1
DROSHA
CELA1
GPS2
PLA2G7
TOLLIP
IL23A
LY96
CASP12
CD28
IL18R1
IL1R2
CCL20
CXCR2
SELP
HC
CARD9
NMI
DUOXA1
IL2
CASP6
AIMP1
TNC
PF4
ZYX
A2M
OLR1
CSRP3
NUPR1
ACER3
CD40LG
SIRPA
FOXP3
AGER
RELA
IL6
PARK7
CEBPB
TNIP2
KNG2
CYP26B1
GPX1
ZMPSTE24
CNR1
TLR7
ZFP36
PTGS1
RICTOR
IL31RA
GHSR
CD14
NRROS
ABCD1
POLB
ADCY7
SMAD1
VPS35
IL15
CDH5
JAM3
TIRAP
CYP19A1
MGLL
MIF
ADRA2A
FANCD2
RHBDD3
CXCL10
CEBPA
MAS1
CCL19
C4B
SCN9A
PGLYRP2
CD81
TGM2
CCR7
MCPH1
UFL1
APPL1
CCR6
SERPINF1
FASL
PRKD1
LPCAT3
IL12B
PRDX2
HMOX1
GGT5
CYBA
CCL21A
AREL1
BCR
HYAL2
GIT1
CYBB
ITGA2
NFE2L2
NKIRAS2
KDM6B
ALOX15
ENPP3
HAVCR2
NR1D1
PER1
F2RL1
AP3B1
CIITA
IL1RAP
SHARPIN
GSDMD
TBC1D23
AHSG
SOD1
PROC
NDFIP1
PTPN2
MS4A2
IL33
SCYL1
AFAP1L2
FASN
RABGEF1
CHID1
HSPD1
IL1RL1
CFH
SCYL3
ITGB6
F2
TYRO3
RASGRP1
NOTCH2
ECM1
B4GALT1
CLOCK
ALDH2
IRF5
PTN
TACR1
OGG1
NFKBIB
CALCA
LAT
IL4RA
SCNN1B
UMOD
CYLD
STAT3
LYN
HIF1A
JAK2
NFKB1
PLA2G4A
LEP
IRAK2
GSTP1
GHRL
ADRB2
AGTR1A
BMPR1B
NDST1
EDNRA
APOA1
LDLR
RORA
PTGS2
FANCA
PXK
CCL5
WNK4
SBNO2
CUEDC2
HK1
NFE2L1
CNTNAP2
SGMS1
DDX3X
NR1H3
AXL
RELB
IRF3
STAT5A
CUL3
CELF1
TRPV1
GGT1
EPHA2
LILRB4B
ISL1
CSF1
LPL
MAPKAPK2
ABR
CD40
ADA
MAP2K3
ADORA2A
RTN4
ACE
STAT5B
NFKBIA
RPS6KA5
RB1
HDAC7
ADIPOQ
ABCC1
CCL25
C3
STING1
CSF1R
FAS
IRF7
SNCA
SLC11A1
PRKCQ
ACVR1
BMP2
DHX36
EPHB2
HGF
TRP73
PRKCZ
BTK
SPHK1
HMGB1
GJA1
ADAM17
SLIT2
SMAD3
ABI3BP
RBPJ
TCIRG1
PPARD
APOE
KIT
PSMB4
PDE2A
DHX9
GATA3
ESR1
EGFR
APPL2
MAPK8
BRD4
NFKB2
ITGAV
MECOM
MTOR
P2RX7
PSMA1
MAPK14
FGFR1
PIK3CD
OPRM1
AKT1
TGFB1
WNT5A
DAB2IP
NOTCH1
EZH2
FOXP1
APP
